# Supplementary material for: Decreased in vivo glutamate/GABA ratio correlates with the social behavior deficit in a mouse model of autism spectrum disorder
Source: PubMed Central journal article supplement (PMC8858545; doi:10.1186/s13041-022-00904-z), 2022-02-19
Supplement: 13041_2022_904_MOESM1_ESM.pdf [file 13041_2022_904_MOESM1_ESM.pdf]

## **List of contents**

Table S1. Total metabolites in the prefrontal cortex

Table S2. Total metabolites in the hippocampus

Supplementary figure 1. Volcano plot showing significant Pearson's correlation between metabolites and rodent sociability

Supplementary figure 2. Other linear regression analyses between metabolites and rodent sociability

Supplementary figure 3. ROC analyses of the prefrontal metabolites

**Table S1. Total metabolites in the prefrontal cortex**

| PFC  | Ab    | Ala | Asp   | Asp | Cr    | Cr  | Pcr    | Pcr | GABA  | GABA | Glc   | Glc | Gln   | Gln | Glu    | Glu | Grc   | Grc | Rh    | Rh  | Gsh   | Gsh | Ins    | Ins | Lac    | Lac | Naa    | Naa | NaaG   | NaaG | So1b   | So1b | Tau    | Tau |       |   |
|------|-------|-----|-------|-----|-------|-----|--------|-----|-------|------|-------|-----|-------|-----|--------|-----|-------|-----|-------|-----|-------|-----|--------|-----|--------|-----|--------|-----|--------|------|--------|------|--------|-----|-------|---|
|      | %SD   | %SD | %SD   | %SD | %SD   | %SD | %SD    | %SD | %SD   | %SD  | %SD   | %SD | %SD   | %SD | %SD    | %SD | %SD   | %SD | %SD   | %SD | %SD   | %SD | %SD    | %SD | %SD    | %SD | %SD    | %SD | %SD    | %SD  | %SD    | %SD  | %SD    |     |       |   |
| WT1  | 1.196 | 81  | 5.331 | 26  | 1.838 | 116 | 12.991 | 16  | 2.375 | 52   | 2.058 | 47  | 6.186 | 18  | 14.332 | 8   | 2.832 | 7   | 0     | 999 | 4.563 | 13  | 9.973  | 10  | 0      | 999 | 8.881  | 9   | 0.38   | 66   | 0      | 999  | 23.41  | 5   |       |   |
| WT2  | 1.874 | 36  | 3.838 | 25  | 0     | 999 | 9.697  | 6   | 2.133 | 41   | 0.122 | 489 | 6.897 | 14  | 12.904 | 7   | 1.748 | 28  | 0.545 | 8   | 4.54  | 10  | 4.862  | 12  | 0      | 999 | 7.658  | 8   | 0.245  | 198  | 0      | 999  | 14.58  | 5   |       |   |
| WT3  | 1.245 | 38  | 7.247 | 19  | 5.654 | 18  | 8.482  | 13  | 3.235 | 28   | 0.515 | 159 | 5.448 | 16  | 18.247 | 4   | 0.606 | 91  | 2.427 | 24  | 4.41  | 11  | 11.537 | 7   | 0      | 999 | 10.878 | 6   | 0.79   | 69   | 0      | 999  | 23.742 | 4   |       |   |
| WT4  | 2.411 | 22  | 7.973 | 19  | 2.968 | 39  | 10.139 | 13  | 3.939 | 21   | 0.70  | 100 | 8.153 | 9   | 17.92  | 4   | 1.429 | 31  | 1.165 | 47  | 4.844 | 8   | 8.819  | 6   | 1.531  | 36  | 10.02  | 5   | 1.395  | 33   | 0      | 999  | 18.073 | 3   |       |   |
| WT5  | 2.832 | 19  | 7.167 | 14  | 5.81  | 14  | 7.158  | 11  | 4.736 | 16   | 1.08  | 64  | 6.507 | 12  | 17.464 | 4   | 1.089 | 38  | 1.745 | 25  | 4.96  | 9   | 11.007 | 6   | 0      | 999 | 10.612 | 5   | 1.148  | 35   | 0      | 999  | 21.888 | 3   |       |   |
| WT6  | 2.154 | 25  | 8.722 | 13  | 4.027 | 36  | 8.915  | 18  | 4.403 | 19   | 0     | 999 | 9.114 | 9   | 18.068 | 4   | 1.689 | 27  | 1.594 | 30  | 5.213 | 8   | 9.317  | 6   | 0      | 999 | 10.917 | 6   | 0.644  | 112  | 0      | 999  | 19.416 | 3   |       |   |
| WT7  | 1.981 | 38  | 8.553 | 13  | 7.413 | 11  | 5.292  | 12  | 4.195 | 20   | 0.88  | 88  | 4.776 | 16  | 18.288 | 4   | 1.332 | 52  | 1.805 | 36  | 5.166 | 8   | 10.248 | 5   | 0      | 999 | 10.658 | 5   | 1.347  | 35   | 0      | 999  | 26.258 | 3   |       |   |
| WT8  | 2.188 | 27  | 8.224 | 13  | 0.348 | 394 | 13.376 | 12  | 5.225 | 16   | 0     | 999 | 5.866 | 13  | 16.968 | 4   | 1.48  | 43  | 1.326 | 38  | 5.166 | 11  | 10.942 | 5   | 0      | 999 | 11.428 | 5   | 0.758  | 63   | 0      | 999  | 28.258 | 3   |       |   |
| WT9  | 1.523 | 35  | 7.107 | 18  | 4.472 | 28  | 8.832  | 15  | 4.508 | 20   | 0.28  | 473 | 4.868 | 18  | 18.684 | 5   | 1.188 | 43  | 1.738 | 31  | 4.412 | 11  | 10.783 | 6   | 2.182  | 28  | 11.452 | 6   | 0.333  | 171  | 0      | 999  | 23.975 | 3   |       |   |
| KO1  | 0.842 | 187 | 5.722 | 18  | 5.648 | 20  | 5.868  | 21  | 3.927 | 23   | 0.542 | 125 | 5.328 | 9   | 13.684 | 6   | 1.601 | 31  | 1.065 | 48  | 5.018 | 10  | 6.82   | 9   | 0      | 999 | 8.652  | 6   | 0.13   | 999  | 16.977 | 4    |        |     |       |   |
| KO2  | 1.683 | 42  | 6.213 | 16  | 3.091 | 39  | 7.366  | 17  | 3.668 | 21   | 0.78  | 94  | 4.313 | 16  | 13.608 | 6   | 1.277 | 38  | 1.045 | 50  | 4.62  | 10  | 8.382  | 7   | 0      | 999 | 8.833  | 6   | 0      | 999  | 20.382 | 4    |        |     |       |   |
| KO3  | 2.196 | 30  | 7.896 | 15  | 5.665 | 22  | 6.43   | 19  | 4.232 | 21   | 0.78  | 94  | 4.313 | 20  | 17.281 | 5   | 1.583 | 30  | 1.343 | 38  | 4.388 | 10  | 8.195  | 7   | 0      | 999 | 10.975 | 6   | 0.793  | 740  | 0      | 999  | 21.384 | 4   |       |   |
| KO4  | 3.337 | 15  | 6.889 | 16  | 3.043 | 33  | 9.837  | 11  | 2.513 | 32   | 0.285 | 247 | 4.728 | 16  | 13.605 | 6   | 0.606 | 77  | 1.724 | 28  | 4.821 | 9   | 10.58  | 6   | 0      | 999 | 10.073 | 5   | 0      | 999  | 21.997 | 3    |        |     |       |   |
| KO5  | 2.095 | 28  | 8.028 | 13  | 5.152 | 23  | 7.888  | 15  | 5.244 | 15   | 0.875 | 84  | 5.417 | 14  | 18.129 | 4   | 1.697 | 25  | 1.8   | 25  | 4.816 | 8   | 9.747  | 6   | 0      | 999 | 11.908 | 6   | 1.108  | 416  | 0      | 999  | 21.146 | 3   |       |   |
| KO6  | 2.905 | 24  | 9.145 | 14  | 1.412 | 129 | 13.512 | 13  | 5.244 | 19   | 1.588 | 63  | 3.883 | 21  | 20.621 | 4   | 1.038 | 48  | 2.305 | 20  | 0.33  | 52  | 4.823  | 8   | 12.109 | 6   | 0      | 999 | 12.227 | 5    | 1.177  | 418  | 0      | 999 | 28.66 | 3 |
| KO7  | 1.75  | 30  | 6.888 | 16  | 5.102 | 17  | 6.712  | 13  | 5.718 | 13   | 1.146 | 61  | 4.791 | 16  | 16.638 | 5   | 2.261 | 27  | 1.438 | 32  | 4.823 | 8   | 9.795  | 6   | 0      | 999 | 11.061 | 5   | 0.345  | 43   | 0      | 999  | 20.591 | 4   |       |   |
| KO8  | 1.396 | 37  | 7.516 | 13  | 3.124 | 30  | 8.375  | 13  | 4.726 | 18   | 0.183 | 396 | 5.555 | 13  | 16.582 | 4   | 1.466 | 28  | 1.194 | 31  | 4.651 | 8   | 8.44   | 7   | 0      | 999 | 9.797  | 5   | 0.355  | 115  | 0      | 999  | 21.382 | 4   |       |   |
| KO9  | 2.774 | 23  | 8.032 | 13  | 1.71  | 89  | 10.152 | 15  | 5.603 | 15   | 0     | 999 | 5.695 | 14  | 16.67  | 5   | 1.46  | 31  | 1.565 | 39  | 4.448 | 10  | 8.748  | 7   | 8.5    | 8   | 12.718 | 5   | 0.355  | 115  | 0      | 999  | 21.753 | 4   |       |   |
| KO10 | 2.051 | 36  | 6.795 | 17  | 4.471 | 24  | 7.445  | 15  | 5.205 | 16   | 0.196 | 381 | 9.495 | 9   | 13.5   | 6   | 1.598 | 31  | 1.275 | 47  | 5.677 | 10  | 6.518  | 10  | 0      | 999 | 11.37  | 5   | 0      | 999  | 19.8   | 5    |        |     |       |   |
| KO11 | 1.941 | 32  | 8.684 | 12  | 4.121 | 26  | 7.378  | 16  | 6.293 | 12   | 0.3   | 223 | 8.997 | 9   | 17.984 | 4   | 1.508 | 24  | 1.117 | 47  | 4.386 | 9   | 7.153  | 7   | 3.238  | 19  | 11.997 | 4   | 0.7    | 61   | 0      | 999  | 17.807 | 4   |       |   |

## Table S2. Total metabolites in the hippocampus

| HPC  | Area  | Area %SD | Area  | Area %SD | Cr    | Cr %SD | Cr     | Cr %SD | P <sub>Cr</sub> | P <sub>Cr</sub> %SD | GABA  | GABA %SD | Glc   | Glc %SD | Gln   | Gln %SD | Glu    | Glu %SD | GPC   | GPC %SD | GPC   | GPC %SD | PCh   | PCh %SD | GSH   | GSH %SD | Ins   | Ins %SD | Ins    | Ins %SD | Lac   | Lac %SD | NAA | NAA %SD | NAA    | NAA %SD | NAG | NAG %SD | Soylio | Soylio %SD | Tau | Tau %SD |
|------|-------|----------|-------|----------|-------|--------|--------|--------|-----------------|---------------------|-------|----------|-------|---------|-------|---------|--------|---------|-------|---------|-------|---------|-------|---------|-------|---------|-------|---------|--------|---------|-------|---------|-----|---------|--------|---------|-----|---------|--------|------------|-----|---------|
| W171 | 1.738 | 37       | 5335  | 17       | 5335  | 19     | 8674   | 8      | 4137            | 3                   | 348   | 18       | 0.898 | 71      | 444   | 17      | 15.714 | 5       | 0.564 | 59      | 0.352 | 26      | 3.935 | 12      | 7.881 | 7       | 0     | 399     | 8.745  | 7       | 2.095 | 18      | 0   | 399     | 18.924 | 3       |     |         |        |            |     |         |
| W172 | 1.539 | 32       | 4.711 | 17       | 5335  | 14     | 8.918  | 11     | 3.48            | 14                  | 1.17  | 18       | 1.118 | 37      | 6.701 | 10      | 12.031 | 5       | 0.417 | 72      | 1.171 | 28      | 4.032 | 13      | 3.04  | 5       | 0     | 399     | 5.513  | 7       | 1.74  | 21      | 0   | 399     | 18.773 | 4       |     |         |        |            |     |         |
| W173 | 2.207 | 24       | 3.218 | 27       | 5335  | 19     | 9.218  | 14     | 41.21           | 14                  | 1.21  | 28       | 18.18 | 54      | 6.084 | 10      | 11.868 | 6       | 0.358 | 59      | 0.899 | 57      | 4.442 | 8       | 4.825 | 2       | 0     | 399     | 7.158  | 7       | 1.578 | 24      | 0   | 399     | 18.584 | 4       |     |         |        |            |     |         |
| W174 | 1.548 | 34       | 4.505 | 17       | 4.897 | 19     | 7.525  | 13     | 2.4             | 13                  | 2.4   | 19       | 0.752 | 64      | 4.899 | 4       | 1.628  | 5       | 0.443 | 59      | 1.385 | 23      | 4.242 | 8       | 6.397 | 0       | 0     | 614     | 7.925  | 6       | 1.578 | 15.985  | 3   |         |        |         |     |         |        |            |     |         |
| W175 | 1.479 | 31       | 5.614 | 17       | 7.119 | 12     | 7.241  | 13     | 4.465           | 13                  | 4.465 | 12       | 0.324 | 142     | 8.292 | 8       | 13.829 | 3       | 0.443 | 74      | 1.585 | 23      | 3.071 | 8       | 6.118 | 0       | 0.827 | 36      | 8.255  | 5       | 1.94  | 19.823  | 3   |         |        |         |     |         |        |            |     |         |
| W177 | 2.545 | 22       | 5.715 | 13       | 6.031 | 19     | 8.232  | 12     | 3.192           | 12                  | 3.192 | 22       | 0.824 | 79      | 4.951 | 15      | 14.597 | 5       | 0.833 | 47      | 1.25  | 20      | 4.071 | 11      | 9.795 | 0       | 2.295 | 20      | 8.257  | 5       | 1.99  | 16.662  | 3   |         |        |         |     |         |        |            |     |         |
| W178 | 3.359 | 16       | 6.073 | 18       | 3.283 | 19     | 8.232  | 13     | 3.15            | 13                  | 3.15  | 22       | 0.39  | 88      | 4.433 | 13      | 14.593 | 5       | 0.677 | 22      | 0.977 | 25      | 4.374 | 8       | 5.023 | 0       | 0     | 399     | 10.219 | 5       | 2.048 | 4.6     | 0   | 399     | 15.535 | 3       |     |         |        |            |     |         |
| W179 | 2.007 | 23       | 7.182 | 12       | 4.231 | 17     | 13.052 | 12     | 5.197           | 12                  | 5.197 | 19       | 0.522 | 108     | 6.424 | 19      | 13.748 | 4       | 0.425 | 27      | 1.976 | 19      | 4.594 | 8       | 5.023 | 0       | 2.787 | 18      | 7.665  | 5       | 2.048 | 4.6     | 0   | 399     | 15.542 | 3       |     |         |        |            |     |         |
| KO1  | 2.057 | 18       | 8.57  | 12       | 2.728 | 12     | 11.152 | 9      | 3.867           | 9                   | 3.867 | 20       | 0.785 | 81      | 5.912 | 14      | 13.748 | 4       | 0.784 | 59      | 1.27  | 37      | 4.874 | 8       | 5.023 | 0       | 1.828 | 44      | 9.618  | 5       | 2.048 | 4.6     | 0   | 399     | 20.577 | 3       |     |         |        |            |     |         |
| KO2  | 1.419 | 38       | 7.347 | 14       | 6.128 | 14     | 11.152 | 12     | 3.086           | 12                  | 3.086 | 25       | 0.785 | 99      | 4.524 | 17      | 16.248 | 4       | 0.784 | 59      | 1.27  | 37      | 4.874 | 8       | 5.023 | 0       | 1.828 | 44      | 9.618  | 5       | 2.048 | 4.6     | 0   | 399     | 20.577 | 3       |     |         |        |            |     |         |
| KO3  | 3.368 | 32       | 4.585 | 14       | 10.21 | 23     | 2.575  | 12     | 6.895           | 12                  | 6.895 | 22       | 2.015 | 66      | 8.144 | 17      | 30.702 | 4       | 0.783 | 69      | 3.085 | 23      | 6.318 | 9       | 6.143 | 0       | 2.826 | 124     | 8.879  | 5       | 2.048 | 4.6     | 0   | 399     | 20.577 | 3       |     |         |        |            |     |         |
| KO4  | 1.139 | 24       | 4.585 | 14       | 6.772 | 9      | 8.272  | 9      | 3.697           | 9                   | 3.697 | 19       | 0.272 | 245     | 6.708 | 14      | 14.87  | 5       | 0.557 | 67      | 1.385 | 23      | 4.218 | 11      | 9.453 | 0       | 1.585 | 28      | 8.825  | 5       | 1.448 | 5.1     | 0   | 399     | 21.232 | 3       |     |         |        |            |     |         |
| KO5  | 1.139 | 24       | 4.585 | 14       | 6.772 | 9      | 8.272  | 9      | 3.697           | 9                   | 3.697 | 19       | 0.272 | 245     | 6.708 | 14      | 14.87  | 5       | 0.557 | 67      | 1.385 | 23      | 4.218 | 11      | 9.453 | 0       | 1.585 | 28      | 8.825  | 5       | 1.448 | 5.1     | 0   | 399     | 21.232 | 3       |     |         |        |            |     |         |
| KO6  | 1.038 | 29       | 4.041 | 16       | 3.308 | 28     | 8.234  | 13     | 2.618           | 13                  | 2.618 | 19       | 1.388 | 28      | 6.061 | 11      | 13.071 | 3       | 1.882 | 42      | 1.219 | 24      | 4.412 | 9       | 8.103 | 0       | 2.105 | 34      | 4.412  | 6       | 3.29  | 13.944  | 3   |         |        |         |     |         |        |            |     |         |
| KO8  | 1.491 | 29       | 4.041 | 16       | 3.308 | 28     | 8.234  | 13     | 2.618           | 13                  | 2.618 | 19       | 1.388 | 28      | 6.061 | 11      | 13.071 | 3       | 1.882 | 42      | 1.219 | 24      | 4.412 | 9       | 8.103 | 0       | 2.105 | 34      | 4.412  | 6       | 3.29  | 13.944  | 3   |         |        |         |     |         |        |            |     |         |
| KO9  | 1.491 | 29       | 4.041 | 16       | 3.308 | 28     | 8.234  | 13     | 2.618           | 13                  | 2.618 | 19       | 1.388 | 28      | 6.061 | 11      | 13.071 | 3       | 1.882 | 42      | 1.219 | 24      | 4.412 | 9       | 8.103 | 0       | 2.105 | 34      | 4.412  | 6       | 3.29  | 13.944  | 3   |         |        |         |     |         |        |            |     |         |
| KO10 | 2.01  | 23       | 4.242 | 21       | 3.751 | 18     | 11.819 | 10     | 2.465           | 10                  | 2.465 | 29       | 0.828 | 58      | 3.022 | 19      | 11.819 | 3       | 0.514 | 43      | 1.445 | 26      | 4.427 | 8       | 3.281 | 0       | 2.105 | 34      | 4.412  | 6       | 3.29  | 13.944  | 3   |         |        |         |     |         |        |            |     |         |
| KO11 | 1.207 | 23       | 4.154 | 17       | 4.592 | 11     | 5.742  | 9      | 2.412           | 9                   | 2.412 | 17       | 0.827 | 77      | 6.171 | 9       | 11.924 | 3       | 0.842 | 30      | 0.465 | 73      | 3.44  | 9       | 4.897 | 0       | 0     | 399     | 6.704  | 6       | 1.603 | 17      | 0   | 399     | 12.478 | 4       |     |         |        |            |     |         |

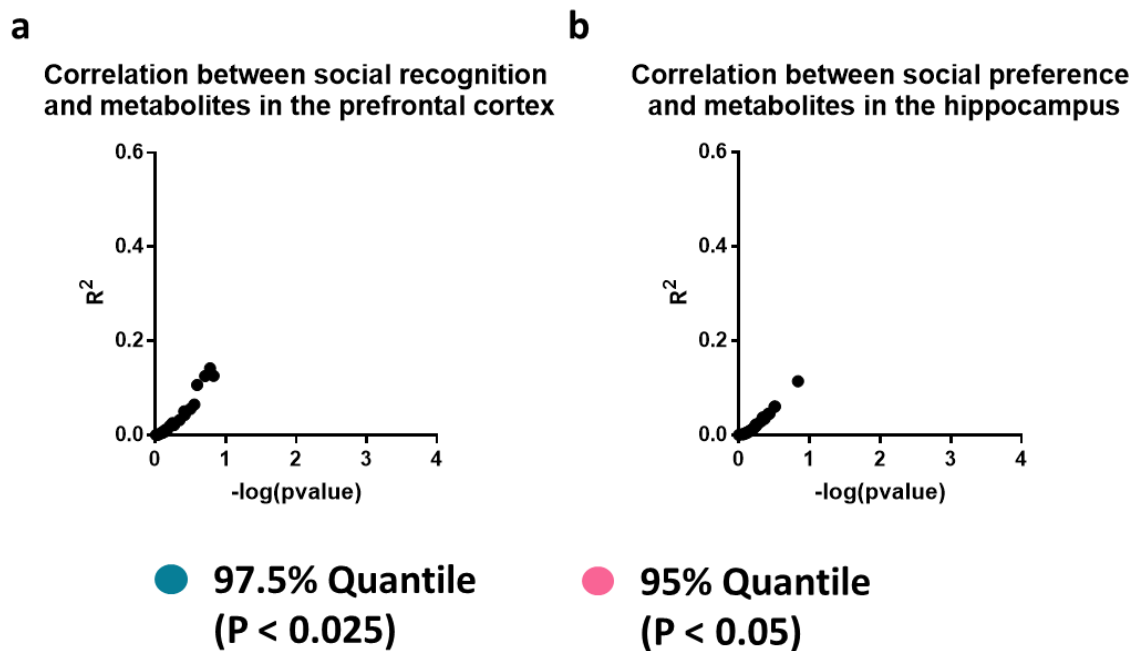

**Supplementary figure 1. Volcano plot showing significant Pearson's correlation between metabolites and rodent sociability**

Correlation between mice social preference index for novel mouse or social preference index for mouse and metabolites in the prefrontal cortex (**a**) and hippocampus (**b**) was calculated, respectively. Metabolites with a significant correlation was colored as pink or cyan depending on the quantile of actual Pearson's coefficient from the permuted values, 95% or 97.5% respectively.

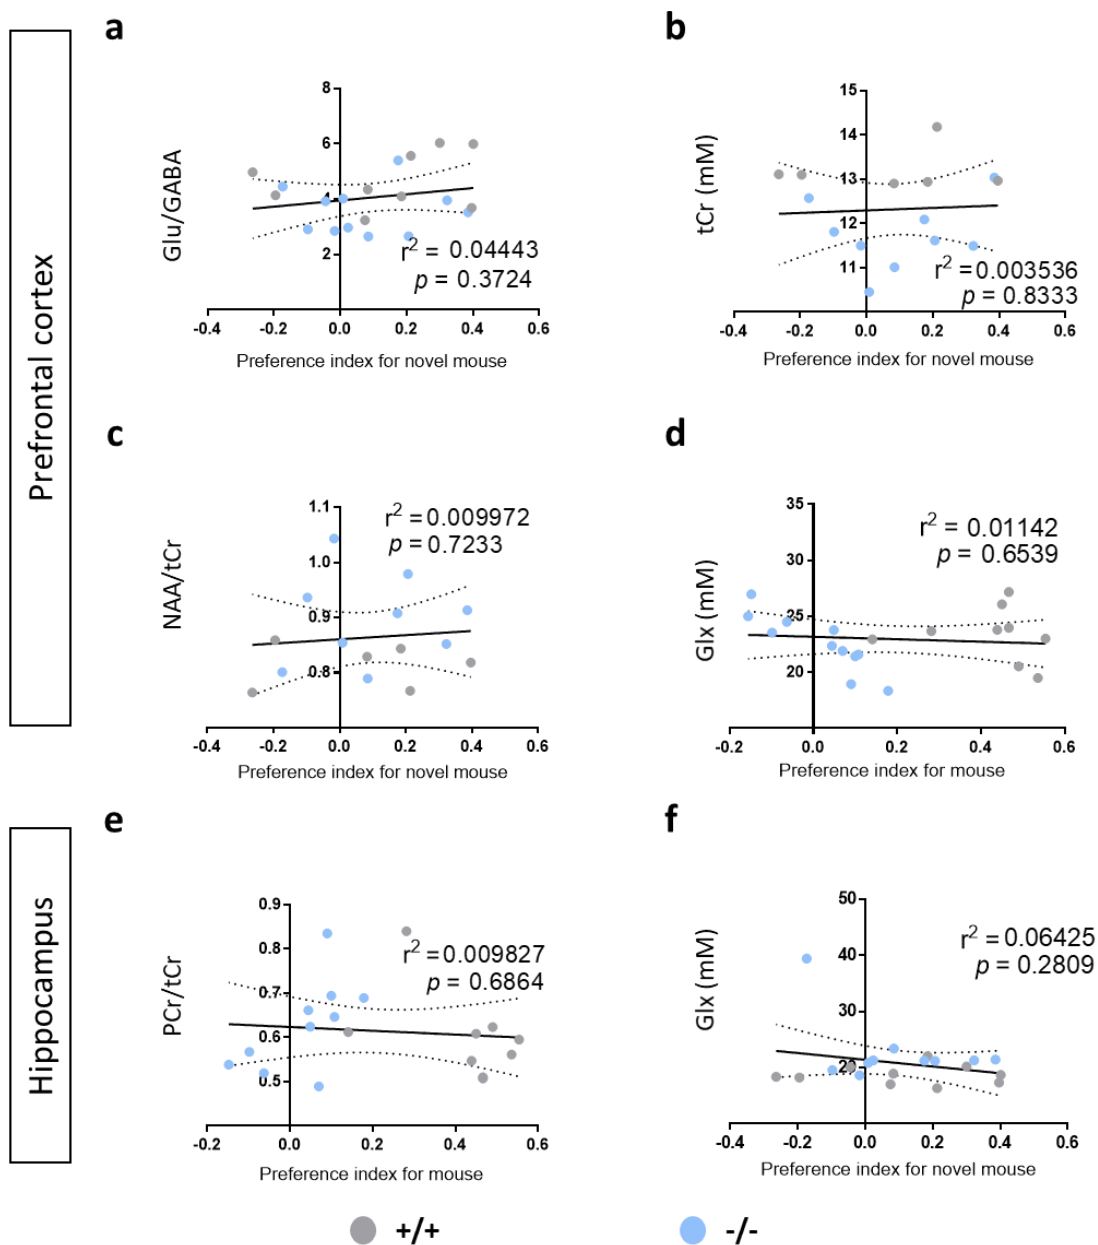

**Supplementary figure 2. Other linear regression analyses between metabolites and rodent sociability**

**(a-c)** Correlation between mice social preference index for novel mouse and each of the significantly altered metabolites in the prefrontal cortex was calculated.

**(d)** Correlation between mice social preference index and Glx, a metabolite significantly altered in the hippocampus was calculated.

(e) Correlation between mice social preference index and PCr/tCr ratio in hippocampus was calculated.

(f) Correlation between mice social preference index for novel mouse and Glx level in hippocampus was calculated.

Each linear regression line is shown with 95% confidence bands (two dotted lines). The degree of significant correlation ( $p$ ) and goodness of fit ( $r^2$ ) were written in each figure.

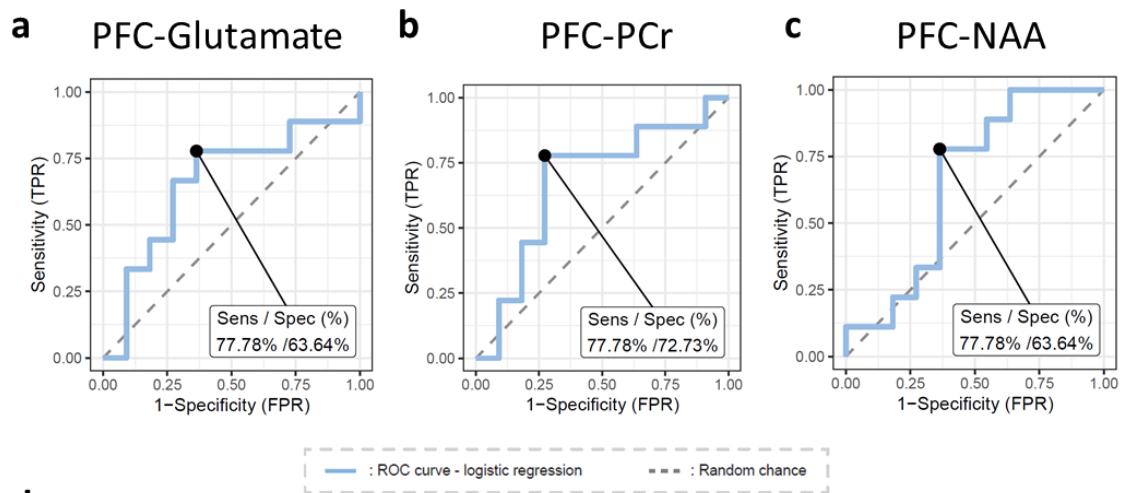

**d**

|                   | <b>Glu</b>  | <b>PCr</b> | <b>NAA</b>  |
|-------------------|-------------|------------|-------------|
| AUC               | 0.657       | 0.677      | 0.657       |
| (95% CI)          | 0.409-0.904 | 0.433-0.92 | 0.409-0.904 |
| Youden Index      | 0.414       | 0.505      | 0.414       |
| Cut-off(log-odds) | -0.156      | -0.262     | -0.329      |

### Supplementary figure 3. ROC curve analyses of the prefrontal metabolites

(a-c) ROC curve analyses of glutamate (Glu), phosphocreatine (pCr), and N-acetylaspartate (NAA) in the prefrontal cortex. Each metabolic substrate is not precise enough to predict the genotype. (d) A table describe a detail information for each ROC analysis.
